# Supplementary material for: Effects of Piper betle L. Extract and Allelochemical Eugenol on Rice and Associated Weeds Germination and Seedling Growth
Source: MDPI journal article supplement (doi:10.3390/plants11233384), 2022-12-05
Supplement: s1 [file s1]

### Supplementary data

**Table S1. Phenylpropanoid constituents in the BE detected by GC-MS**

| Peak | RT (min) | compounds                     | % of total |
|------|----------|-------------------------------|------------|
| 1    | 9.5      | chavicol                      | 0.15       |
| 2    | 10.7     | chavicol acetate              | 1.14       |
| 3    | 11.1     | isoeugenol                    | 1.74       |
| 4    | 11.5     | methyleugenol                 | 0.05       |
| 5    | 13.1     | eugenol acetate               | 16.18      |
| 6    | 14.5     | 4-allyl-1,2-diacetoxy benzene | 49.68      |

**Table S2. Effects of BE on seeds germination of tested plants by means of paper-plate assay.**

| <b>Plant samples</b>        | <b>Betel extract (mg/mL)</b> | <b>Germination (%)</b> |
|-----------------------------|------------------------------|------------------------|
| <b>Rice</b>                 | 0                            | 99 ± 1.2 <sup>a</sup>  |
|                             | 0.25                         | 98 ± 0.0 <sup>a</sup>  |
|                             | 0.5                          | 96 ± 0.0 <sup>a</sup>  |
|                             | 1                            | 74 ± 4.0 <sup>b</sup>  |
|                             | 2                            | 14 ± 2.0 <sup>c</sup>  |
| <b>Swollen finger grass</b> | 0                            | 93 ± 6.1 <sup>a</sup>  |
|                             | 0.05                         | 8 ± 3.5 <sup>b</sup>   |
|                             | 0.1                          | 0 ± 0.0 <sup>c</sup>   |
|                             | 0.2                          | 0 ± 0.0 <sup>c</sup>   |
| <b>False daisy</b>          | 0                            | 97 ± 2.3 <sup>a</sup>  |
|                             | 0.125                        | 93 ± 1.2 <sup>a</sup>  |
|                             | 0.25                         | 57 ± 4.2 <sup>b</sup>  |
|                             | 0.5                          | 11 ± 4.2 <sup>c</sup>  |
|                             | 1                            | 0 ± 0.0 <sup>d</sup>   |
| <b>Barnyard grass</b>       | 0                            | 100 ± 0.0 <sup>a</sup> |
|                             | 0.25                         | 96 ± 2.0 <sup>b</sup>  |
|                             | 0.5                          | 96 ± 2.0 <sup>b</sup>  |
|                             | 1                            | 20 ± 2.0 <sup>c</sup>  |
|                             | 2                            | 0 ± 0.0 <sup>d</sup>   |
| <b>Weedy rice</b>           | 0                            | 99 ± 2.3 <sup>a</sup>  |
|                             | 1                            | 95 ± 6.1 <sup>a</sup>  |
|                             | 2                            | 13 ± 8.3 <sup>b</sup>  |
|                             | 3                            | 0 ± 0.0 <sup>c</sup>   |

Values are means ± SD of triplicate sets (n > 100). Different superscript letters indicate statistically significant differences of germination among different BE concentrations at  $p < 0.05$

**Table S3. Effects of BE on root and shoot length of 7DAG seedlings by means of paper-plate assay.**

| Plant samples           | Betel extract<br>(mg/mL) | Length (cm)            |                        | Root/Shoot<br>ratio | R/S ratio<br>(%) |
|-------------------------|--------------------------|------------------------|------------------------|---------------------|------------------|
|                         |                          | Root                   | Shoot                  |                     |                  |
| Rice                    | 0.00                     | 6.2 ± 1.8 <sup>a</sup> | 3.3 ± 0.7 <sup>a</sup> | 1.9                 | 100              |
|                         | 0.25                     | 4.6 ± 1.3 <sup>b</sup> | 2.7 ± 0.8 <sup>b</sup> | 1.7                 | 89               |
|                         | 0.50                     | 2.9 ± 0.9 <sup>c</sup> | 2.4 ± 0.8 <sup>b</sup> | 1.2                 | 63               |
|                         | 1.00                     | 0.6 ± 0.3 <sup>d</sup> | 1.8 ± 0.8 <sup>c</sup> | 0.3                 | 16               |
|                         | 2.00                     | 0.0 ± 0.0 <sup>d</sup> | 0.8 ± 0.5 <sup>d</sup> | 0.0                 | 0                |
| Swollen finger<br>grass | 0.00                     | 1.4 ± 0.2 <sup>a</sup> | 0.7 ± 0.1 <sup>a</sup> | 2.0                 | 100              |
|                         | 0.05                     | 1.2 ± 0.2 <sup>b</sup> | 0.8 ± 0.1 <sup>a</sup> | 1.5                 | 75               |
|                         | 0.10                     | 0.0 ± 0.0 <sup>c</sup> | 0.0 ± 0.0 <sup>b</sup> | 0.0                 | 0                |
|                         | 0.20                     | 0.0 ± 0.0 <sup>c</sup> | 0.0 ± 0.0 <sup>b</sup> | 0.0                 | 0                |
| False daisy             | 0.00                     | 1.5 ± 0.5 <sup>a</sup> | 0.6 ± 0.2 <sup>a</sup> | 2.5                 | 100              |
|                         | 0.125                    | 0.8 ± 0.3 <sup>b</sup> | 0.5 ± 0.1 <sup>b</sup> | 1.6                 | 64               |
|                         | 0.25                     | 0.3 ± 0.1 <sup>c</sup> | 0.4 ± 0.1 <sup>c</sup> | 0.7                 | 28               |
|                         | 0.50                     | 0.0 ± 0.0 <sup>d</sup> | 0.3 ± 0.1 <sup>d</sup> | 0.0                 | 0                |
|                         | 1.00                     | 0.0 ± 0.0 <sup>d</sup> | 0.0 ± 0.0 <sup>e</sup> | 0.0                 | 0                |
| Barnyard<br>grass       | 0.00                     | 2.4 ± 1.0 <sup>a</sup> | 2.9 ± 0.6 <sup>a</sup> | 0.8                 | 100              |
|                         | 0.25                     | 2.2 ± 0.7 <sup>a</sup> | 3.0 ± 0.6 <sup>a</sup> | 0.9                 | 113              |
|                         | 0.50                     | 0.3 ± 0.1 <sup>b</sup> | 2.8 ± 0.6 <sup>a</sup> | 0.2                 | 25               |
|                         | 1.00                     | 0.0 ± 0.0 <sup>b</sup> | 0.4 ± 0.3 <sup>b</sup> | 0.0                 | 0                |
|                         | 2.00                     | 0.0 ± 0.0 <sup>b</sup> | 0.0 ± 0.0 <sup>c</sup> | 0.0                 | 0                |
| Weedy rice              | 0.00                     | 5.6 ± 1.7 <sup>a</sup> | 3.6 ± 1.2 <sup>a</sup> | 1.5                 | 100              |
|                         | 1.00                     | 0.5 ± 0.3 <sup>b</sup> | 2.1 ± 0.7 <sup>b</sup> | 0.2                 | 13               |
|                         | 2.00                     | 0.0 ± 0.0 <sup>b</sup> | 0.4 ± 0.2 <sup>c</sup> | 0.0                 | 0                |
|                         | 3.00                     | 0.0 ± 0.0 <sup>b</sup> | 0.0 ± 0.0 <sup>c</sup> | 0.0                 | 0                |

Values are means ± SD of triplicate sets (n > 100). Different superscript letters indicate statistically significant differences of length among different BE concentrations at  $p < 0.05$ .

**Table S4. Effects of EU on seeds germination of tested plants by means of paper-plate assay.**

| <b>Plant samples</b>        | <b>Eugenol (mg/mL)</b> | <b>Germination (%)</b>  |
|-----------------------------|------------------------|-------------------------|
| <b>Rice</b>                 | 0                      | 99 ± 2.3 <sup>a</sup>   |
|                             | 0.08                   | 95 ± 2.3 <sup>a</sup>   |
|                             | 0.16                   | 96 ± 0.0 <sup>a</sup>   |
|                             | 0.32                   | 77 ± 4.2 <sup>b</sup>   |
|                             | 0.64                   | 0 ± 0.0 <sup>c</sup>    |
| <b>Swollen finger grass</b> | 0.00                   | 93 ± 5.8 <sup>a</sup>   |
|                             | 0.02                   | 80 ± 10.6 <sup>ab</sup> |
|                             | 0.04                   | 68 ± 6.9 <sup>b</sup>   |
|                             | 0.08                   | 0 ± 0.0 <sup>c</sup>    |
| <b>False daisy</b>          | 0.00                   | 95 ± 2.3 <sup>a</sup>   |
|                             | 0.04                   | 91 ± 7.6 <sup>ab</sup>  |
|                             | 0.08                   | 86 ± 5.3 <sup>ab</sup>  |
|                             | 0.16                   | 91 ± 1.2 <sup>b</sup>   |
|                             | 0.32                   | 0 ± 0.0 <sup>c</sup>    |
| <b>Barnyard grass</b>       | 0.00                   | 97 ± 4.6 <sup>a</sup>   |
|                             | 0.08                   | 95 ± 2.3 <sup>a</sup>   |
|                             | 0.16                   | 92 ± 4.0 <sup>a</sup>   |
|                             | 0.32                   | 2 ± 2.0 <sup>b</sup>    |
| <b>Weedy rice</b>           | 0.00                   | 100 ± 0.0 <sup>a</sup>  |
|                             | 0.08                   | 100 ± 0.0 <sup>a</sup>  |
|                             | 0.16                   | 100 ± 0.0 <sup>a</sup>  |
|                             | 0.32                   | 100 ± 0.0 <sup>a</sup>  |
|                             | 0.64                   | 0 ± 0.0 <sup>b</sup>    |

Values are means ± SD of triplicate sets (n >100). Different superscript letters indicate statistically significant differences of germination among different EU concentrations at  $p < 0.05$

**Table S5. Effects of EU on root and shoot length of 7DAG seedlings by means of paper-plate assay.**

| Plant samples           | Eugenol<br>(mg/mL) | Length (cm)            |                        | Root/Shoot<br>ratio | R/S ratio<br>(%) |
|-------------------------|--------------------|------------------------|------------------------|---------------------|------------------|
|                         |                    | Root                   | Shoot                  |                     |                  |
| Rice                    | 0.00               | 3.8 ± 0.5 <sup>a</sup> | 1.6 ± 0.3 <sup>a</sup> | 2.4                 | 100              |
|                         | 0.08               | 4.3 ± 0.7 <sup>b</sup> | 1.9 ± 0.6 <sup>b</sup> | 2.2                 | 92               |
|                         | 0.16               | 2.7 ± 0.7 <sup>c</sup> | 1.0 ± 0.3 <sup>c</sup> | 2.7                 | 112              |
|                         | 0.32               | 0.1 ± 0.1 <sup>d</sup> | 0.3 ± 0.1 <sup>d</sup> | 0.4                 | 17               |
|                         | 0.64               | 0.0 ± 0.0 <sup>d</sup> | 0.0 ± 0.0 <sup>e</sup> | 0.0                 | 0                |
| Swollen finger<br>grass | 0.00               | 2.1 ± 0.2 <sup>a</sup> | 1.2 ± 0.0 <sup>a</sup> | 1.8                 | 100              |
|                         | 0.02               | 2.2 ± 0.2 <sup>a</sup> | 1.2 ± 0.0 <sup>a</sup> | 1.8                 | 104              |
|                         | 0.04               | 0.6 ± 0.1 <sup>b</sup> | 0.4 ± 0.1 <sup>b</sup> | 1.5                 | 86               |
|                         | 0.08               | 0.0 ± 0.0 <sup>c</sup> | 0.0 ± 0.0 <sup>c</sup> | 0.0                 | 0                |
| False daisy             | 0.00               | 2.3 ± 0.4 <sup>a</sup> | 0.7 ± 0.2 <sup>a</sup> | 3.3                 | 100              |
|                         | 0.04               | 1.6 ± 0.5 <sup>b</sup> | 0.6 ± 0.2 <sup>a</sup> | 2.6                 | 79               |
|                         | 0.08               | 0.6 ± 0.2 <sup>c</sup> | 0.7 ± 0.3 <sup>a</sup> | 0.9                 | 26               |
|                         | 0.16               | 0.1 ± 0.0 <sup>d</sup> | 0.3 ± 0.1 <sup>b</sup> | 0.4                 | 12               |
|                         | 0.32               | 0.0 ± 0.0 <sup>d</sup> | 0.0 ± 0.0 <sup>c</sup> | 0.0                 | 0                |
| Barnyard<br>grass       | 0.00               | 2.8 ± 1.7 <sup>a</sup> | 3.0 ± 0.1 <sup>a</sup> | 0.9                 | 100              |
|                         | 0.08               | 2.9 ± 0.1 <sup>a</sup> | 2.8 ± 0.0 <sup>a</sup> | 1.0                 | 111              |
|                         | 0.16               | 0.8 ± 0.2 <sup>b</sup> | 1.4 ± 0.1 <sup>b</sup> | 0.6                 | 61               |
|                         | 0.32               | 0.0 ± 0.0 <sup>c</sup> | 0.0 ± 0.0 <sup>c</sup> | 0.0                 | 0                |
| Weedy rice              | 0.00               | 6.1 ± 0.2 <sup>a</sup> | 5.7 ± 0.0 <sup>a</sup> | 1.1                 | 100              |
|                         | 0.08               | 5.8 ± 0.3 <sup>a</sup> | 5.0 ± 0.2 <sup>b</sup> | 1.1                 | 108              |
|                         | 0.16               | 3.0 ± 0.4 <sup>b</sup> | 5.2 ± 0.3 <sup>b</sup> | 0.6                 | 53               |
|                         | 0.32               | 2.1 ± 0.1 <sup>c</sup> | 2.6 ± 0.1 <sup>c</sup> | 0.8                 | 76               |
|                         | 0.64               | 0.0 ± 0.0 <sup>d</sup> | 0.0 ± 0.0 <sup>d</sup> | 0.0                 | 0                |

Values are means ± SD of triplicate sets (n >100). Different superscript letters indicate statistically significant differences of length among different EU concentrations at  $p < 0.05$ .

**Table S6. Effect of betel extract on rice seedling root growth and development by means of in-gel assay.**

| <b>Betel extract<br/>(mg/mL)</b> | <b>PR Length<br/>(cm)</b> | <b>CR Number</b>       | <b>CR length<br/>(cm)</b> | <b>LR density</b>       |
|----------------------------------|---------------------------|------------------------|---------------------------|-------------------------|
| 0                                | 5.8 ± 0.4 <sup>a</sup>    | 3.0 ± 0.0 <sup>a</sup> | 2.5 ± 0.2 <sup>a</sup>    | 11.2 ± 1.7 <sup>a</sup> |
| 0.025                            | 5.3 ± 0.4 <sup>a</sup>    | 3.0 ± 0.0 <sup>a</sup> | 2.4 ± 0.3 <sup>a</sup>    | 8.7 ± 2.4 <sup>a</sup>  |
| 0.05                             | 3.1 ± 0.1 <sup>b</sup>    | 2.9 ± 0.1 <sup>a</sup> | 2.1 ± 0.0 <sup>b</sup>    | 5.6 ± 2.9 <sup>ab</sup> |
| 0.1                              | 1.3 ± 0.2 <sup>c</sup>    | 2.2 ± 0.3 <sup>b</sup> | 0.5 ± 0.3 <sup>c</sup>    | 2.7 ± 2.3 <sup>b</sup>  |
| 0.2                              | 0.2 ± 0.1 <sup>d</sup>    | 0.0 ± 0.0 <sup>c</sup> | 0.0 ± 0.0 <sup>d</sup>    | 0.0 ± 0.0 <sup>b</sup>  |

Values are means ± SD of triplicate sets (n > 30). Different superscript letters indicate statistically significant differences of values among different BE concentrations at  $p < 0.05$ .

PR, primary root; CR, crown root; LR, lateral root

**Table S7. Effect of eugenol on rice seedling root growth and development by means of in-gel assay.**

| <b>Eugenol<br/>(mg/mL)</b> | <b>PR Length<br/>(cm)</b> | <b>CR Number</b>       | <b>CR length<br/>(cm)</b> | <b>LR density</b>      |
|----------------------------|---------------------------|------------------------|---------------------------|------------------------|
| 0                          | 5.3 ± 0.8 <sup>a</sup>    | 3.0 ± 0.0 <sup>a</sup> | 2.3 ± 0.6 <sup>a</sup>    | 9.0 ± 0.5 <sup>a</sup> |
| 0.025                      | 3.2 ± 0.4 <sup>b</sup>    | 2.9 ± 0.2 <sup>a</sup> | 1.4 ± 0.6 <sup>ab</sup>   | 9.7 ± 1.0 <sup>a</sup> |
| 0.05                       | 2.9 ± 0.2 <sup>b</sup>    | 2.4 ± 0.1 <sup>b</sup> | 0.8 ± 0.4 <sup>bc</sup>   | 4.7 ± 2.0 <sup>b</sup> |
| 0.1                        | 1.6 ± 0.0 <sup>c</sup>    | 1.0 ± 0.0 <sup>c</sup> | 0.3 ± 0.1 <sup>c</sup>    | 0.0 ± 0.0 <sup>c</sup> |
| 0.2                        | 0.3 ± 0.1 <sup>d</sup>    | 0.0 ± 0.0 <sup>d</sup> | 0.0 ± 0.0 <sup>c</sup>    | 0.0 ± 0.0 <sup>c</sup> |

Values are means ± SD of triplicate sets (n > 30). Different superscript letters indicate statistically significant differences of values among different EU concentrations at p < 0.05. PR, primary root; CR, crown root; LR, lateral root
